# Supplementary material for: Ferrocenylselenoether and its cuprous cluster modified TiO2 as visible-light photocatalyst for the synergistic transformation of N-cyclic organics and Cr(vi)
Source: Royal Society of Chemistry journal article supplement (doi:10.1039/d3ra07390d), 2024-01-01
Supplement: d3ra07390d1.pdf [file d3ra07390d1.pdf]

# **Ferrocenylselenoether and its Cuprous Cluster Modified TiO<sub>2</sub> as Visible-light Photocatalyst for Synergistic Transformation of N-Cyclic Organics and Cr (VI)**

Zhuo Yang<sup>a</sup>, Jinshan Wang<sup>a</sup>, Aimin Li<sup>b</sup>, Chao Wang<sup>a,c</sup>, Wei Ji<sup>a,\*</sup>, Elísabet Pires<sup>c</sup>, Wenzhong Yang<sup>a</sup>, Su Jing<sup>a,\*</sup>

---

<sup>a</sup> School of Chemistry and Molecular Engineering, Nanjing Tech University, Nanjing 211816, China. Email: buffycomji@njtech.edu.cn (W. Ji), sjing@njtech.edu.cn (S. Jing)

<sup>b</sup> State Key Laboratory of Pollution Control and Resource Reuse, School of the Environment, Nanjing University, Nanjing 210023, China

<sup>c</sup> Instituto de Síntesis Química y Catálisis Homogénea, CSIC-Universidad de Zaragoza, Pedro Cerbuna 12, E-50009 Zaragoza, Spain.

## Preparation of L0 and fcSe

**Figure S1.** Crystallographic structure of L0.

**Figure S2.**  $^1\text{H}$  NMR spectrum of L0.

**Figure S3.** HRMS spectrum of L0.

**Figure S4.**  $^1\text{H}$  NMR spectrum of fcSe.

**Figure S5.** HR MS spectrum of fcSe.

**Figure S6.** High-resolution XPS spectrum of Ti 2p in fcSe@TiO<sub>2</sub>.

**Figure S7.** TEM images of fcSe@TiO<sub>2</sub> nanoparticles and size distribution.

**Figure S8.** TEM images of [Cu<sub>2</sub>I<sub>2</sub>(fcSe)<sub>2</sub>]<sub>n</sub>@TiO<sub>2</sub> nanoparticles and size distribution.

**Figure S9.** FTIR spectra of TiO<sub>2</sub>, fcSe, fcSe@TiO<sub>2</sub> and [Cu<sub>2</sub>I<sub>2</sub>(fcSe)<sub>2</sub>]<sub>n</sub>@TiO<sub>2</sub>.

**Figure S10.** Nitrogen adsorption-desorption isotherms of fcSe@TiO<sub>2</sub> (blue) and [Cu<sub>2</sub>I<sub>2</sub>(fcSe)<sub>2</sub>]<sub>n</sub>@TiO<sub>2</sub> (red).

**Figure S11.** The first derivative of the Tauc Plot curve for fcSe@TiO<sub>2</sub> and [Cu<sub>2</sub>I<sub>2</sub>(fcSe)<sub>2</sub>]<sub>n</sub>@TiO<sub>2</sub>.

**Figure S12.** Transformation efficiency of (a) fcSe@TiO<sub>2</sub>, (b) [Cu<sub>2</sub>I<sub>2</sub>(fcSe)<sub>2</sub>]<sub>n</sub>@TiO<sub>2</sub> for TC and Cr(VI) in multiple catalytic cycles.

**Figure S13.** TEM images of fcSe@TiO<sub>2</sub> nanoparticles and size distribution after five catalytic cycles.

**Figure S14.** TEM images of [Cu<sub>2</sub>I<sub>2</sub>(fcSe)<sub>2</sub>]<sub>n</sub>@TiO<sub>2</sub> nanoparticles and size distribution after five catalytic cycles.

**Figure S15.** FTIR spectra of TiO<sub>2</sub>, fcSe, fcSe@TiO<sub>2</sub> and [Cu<sub>2</sub>I<sub>2</sub>(fcSe)<sub>2</sub>]<sub>n</sub>@TiO<sub>2</sub> after five cycles.

**Figure S16.** The fluorescence change of SOSG in response to <sup>1</sup>O<sub>2</sub> generated in the [Cu<sub>2</sub>I<sub>2</sub>(fcSe)<sub>2</sub>]<sub>n</sub>@TiO<sub>2</sub> system with  $\cdot\text{O}_2^-$  scavenger p-BQ (red line) or TEMPOL (blue line).

**Figure S17.** The spectrum of the Xenon Lamp MC-PF300C.

**Table S1.** Crystallographic data for the L0.

**Table S2.** Selected bond lengths (Å) and bond angles (°) for L0.

**Table S3.** Zeta potentials and Z-average hydrodynamic diameters of fcSe@TiO<sub>2</sub> and [Cu<sub>2</sub>I<sub>2</sub>(fcSe)<sub>2</sub>]<sub>n</sub>@TiO<sub>2</sub> at different pH.

**Table S4.** TC photocatalytic degradation efficiency comparison of **fcSe@TiO<sub>2</sub>** and **[Cu<sub>2</sub>I<sub>2</sub>(fcSe)<sub>2</sub>]<sub>n</sub>@TiO<sub>2</sub>** with other representative systems.

**Table S5.** LC-MS spectra of degradation products.

**Table S6.** Evaluation of **fcSe@TiO<sub>2</sub>** and **[Cu<sub>2</sub>I<sub>2</sub>(fcSe)<sub>2</sub>]<sub>n</sub>@TiO<sub>2</sub>** in the visible light photo-degradation of representative N-cyclic organics.

**References**

## Preparation of **L0** and **fcSe**

All starting materials were analytical grade reagents and purchased from Aladdin or Source Leaf, and used without further purification unless otherwise specified. TiO<sub>2</sub> was commercial P25 (75% anatase, 25% rutile). 1,2,3-Triseleno[3]ferrocenophane **fcSe**<sub>3</sub> (**fc** = [Fe( $\eta^5$ -C<sub>5</sub>H<sub>4</sub>)( $\eta^5$ -C<sub>5</sub>H<sub>4</sub>)]) was prepared according to literature method<sup>1</sup>.

**L0**: **fcSe**<sub>3</sub> (0.426 g, 1 mmol) and NaBH<sub>4</sub> (0.378 g, 10 mmol) were added into anhydrous ethanol (150 mL) under nitrogen atmosphere. The reaction was performed at 0 °C for 30 min, then at 25 °C for 2 h. A THF solution of methyl 4-(bromomethyl)benzoate (0.458 g, 2 mmol) was added, and the reaction was carried out at 25 °C for 24 h. The solid precipitation was obtained by evaporation under reduced pressure, and was treated with water (50 mL) and extracted with dichloromethane (3×50 mL). The extract was dried over magnesium sulfate, evaporated to dryness. The yellowish solid 1,1'-bis[1-(methyl-4-benzoic acid methyl ester)-seleno]ferrocene (**L0**) was obtained by elution with petroleum ether/ethyl acetate (15:1 v/v). Yield 0.457 g (68%). <sup>1</sup>H NMR (400 MHz, CDCl<sub>3</sub>,  $\delta$ ): 7.89, 7.87, 7.11, 7.09 (m, 8H, -ArH), 4.16, 4.09 (dd, 8H, -fcH), 3.91 (s, 4H, -Se-CH<sub>2</sub>-) 3.79 (s, 6H, -CH<sub>3</sub>). ESIMS: 642.8 ([M+H]<sup>+</sup>).

KOH (0.310 g, 5.5 mmol) was added to ethanol (150 mL) solution of **L0** (0.450 g, 0.7 mmol), then the mixture was left to react at 80 °C for 2 h. Part of the solvent was removed by evaporation under reduced pressure, then treated with dichloromethane (50 mL) and extracted with water (3×50 mL). Concentrated hydrochloric acid was added dropwise to the aqueous phase to adjust the acidity to pH=1.0. The yellow precipitation was collected to obtain the target product 1,1'-bis((4-carboxybenzyl)seleno)ferrocene (**fcSe**). Yield 0.381g (86%). <sup>1</sup>H NMR (400 MHz, DMSO-d<sub>6</sub>,  $\delta$ ): 12.84 (s, -COOH), 7.78, 7.76 (m, 8H, -ArH), 4.20, 4.09 (dd, 8H, -fcH), 3.87 (s, 4H, -Se-CH<sub>2</sub>-). ESIMS: 614.9 ([M+H]<sup>+</sup>).

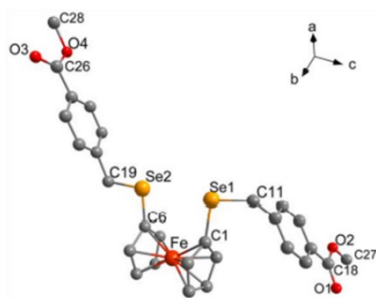

**Figure S1.** Crystallographic structure of **L0**.

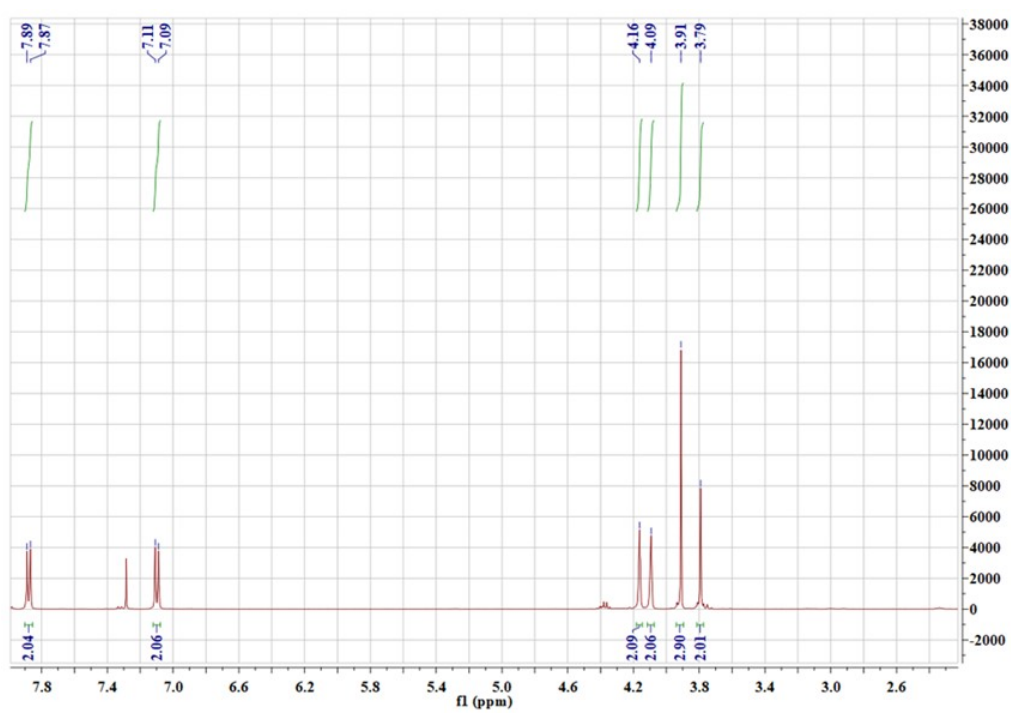

**Figure S2.**  $^1\text{H}$  NMR spectrum of **L0**.

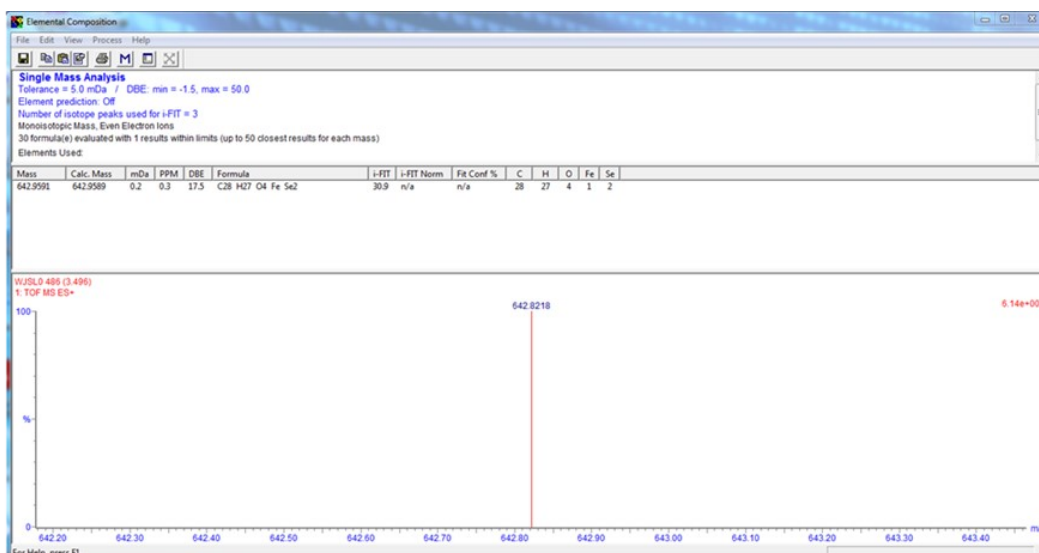

**Elemental Composition Report**

Page 1

**Single Mass Analysis**

Tolerance = 5.0 mDa / DBE: min = -1.5, max = 50.0

Element prediction: Off

Number of isotope peaks used for i-FIT = 3

Monoisotopic Mass, Even Electron Ions

30 formula(e) evaluated with 1 results within limits (up to 50 closest results for each mass)

Elements Used:

C: 24-30 H: 22-28 O: 2-6 Fe: 0-2 Se: 0-2

WJSL0 486 (3.496)

1: TOF MS ES+

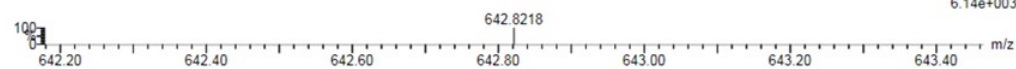

Minimum:

Maximum: 5.0 10.0 -1.5 50.0

| Mass | Calc. Mass | mDa | PPM | DBE | i-FIT | Norm | Conf (%) | Formula |
|------|------------|-----|-----|-----|-------|------|----------|---------|
|------|------------|-----|-----|-----|-------|------|----------|---------|

|          |          |     |     |      |      |     |     |                   |
|----------|----------|-----|-----|------|------|-----|-----|-------------------|
| 642.9591 | 642.9589 | 0.2 | 0.3 | 17.5 | 30.9 | n/a | n/a | C28 H27 O4 Fe Se2 |
|----------|----------|-----|-----|------|------|-----|-----|-------------------|

**Figure S3. HRMS spectrum of L0.**

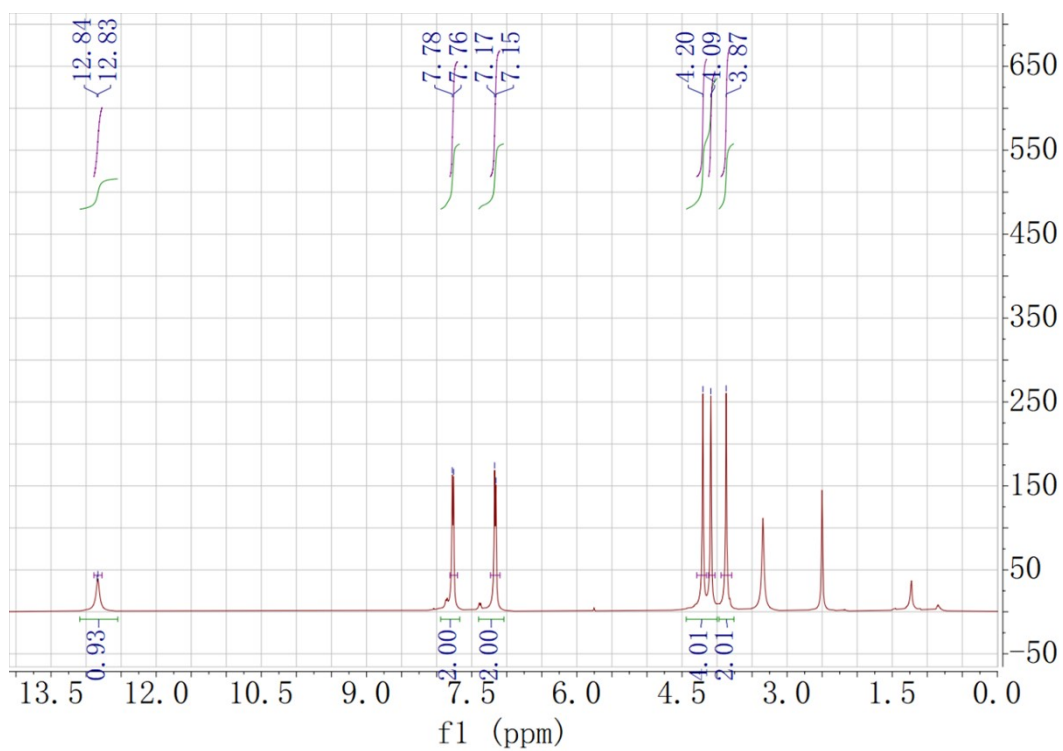

**Figure S4.**  $^1\text{H}$  NMR spectrum of  $\text{fcSe}$ .

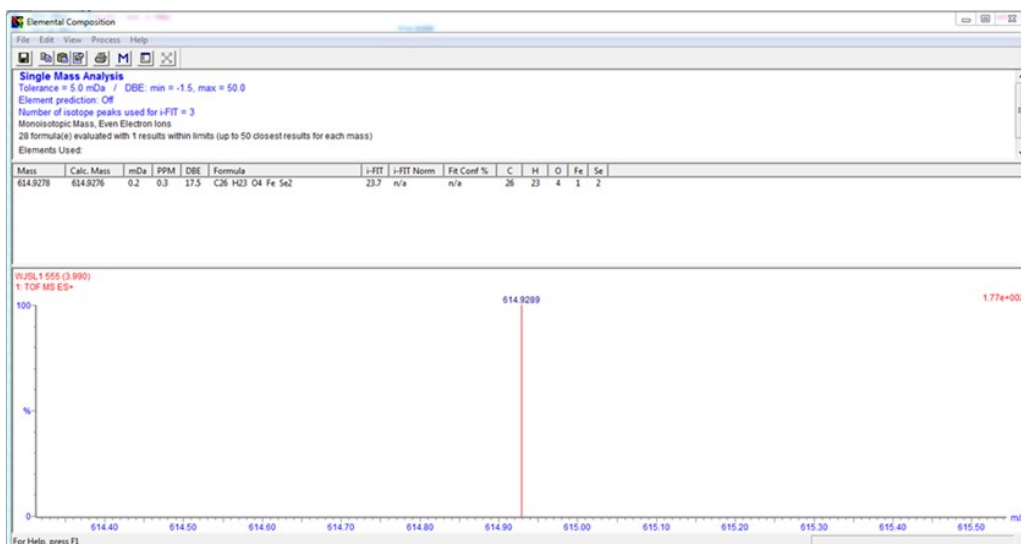

### Elemental Composition Report

Page 1

#### Single Mass Analysis

Tolerance = 5.0 mDa / DBE: min = -1.5, max = 50.0

Element prediction: Off

Number of isotope peaks used for i-FIT = 3

Monoisotopic Mass, Even Electron Ions

28 formula(e) evaluated with 1 results within limits (up to 50 closest results for each mass)

Elements Used:

C: 24-30 H: 22-28 O: 2-6 Fe: 0-2 Se: 0-2

WJSL1 555 (3 990)

1: TOF MS ES+

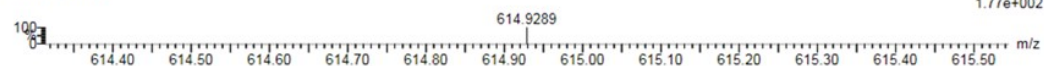

Minimum:

Maximum: 5.0 10.0 -1.5 50.0

| Mass     | Calc. Mass | mDa | PPM | DBE  | i-FIT | Norm | Conf (%) | Formula                                                           |
|----------|------------|-----|-----|------|-------|------|----------|-------------------------------------------------------------------|
| 614.9278 | 614.9276   | 0.2 | 0.3 | 17.5 | 23.7  | n/a  | n/a      | C <sub>26</sub> H <sub>23</sub> O <sub>4</sub> Fe Se <sub>2</sub> |

Figure S5. HRMS spectrum of fcSe.

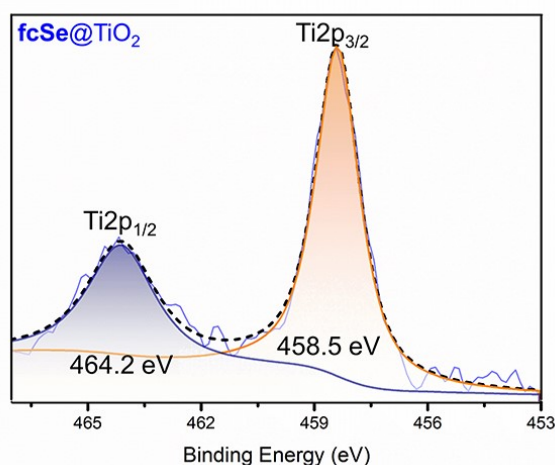

Figure S6. High-resolution XPS spectrum of Ti 2p in fcSe@TiO<sub>2</sub>.



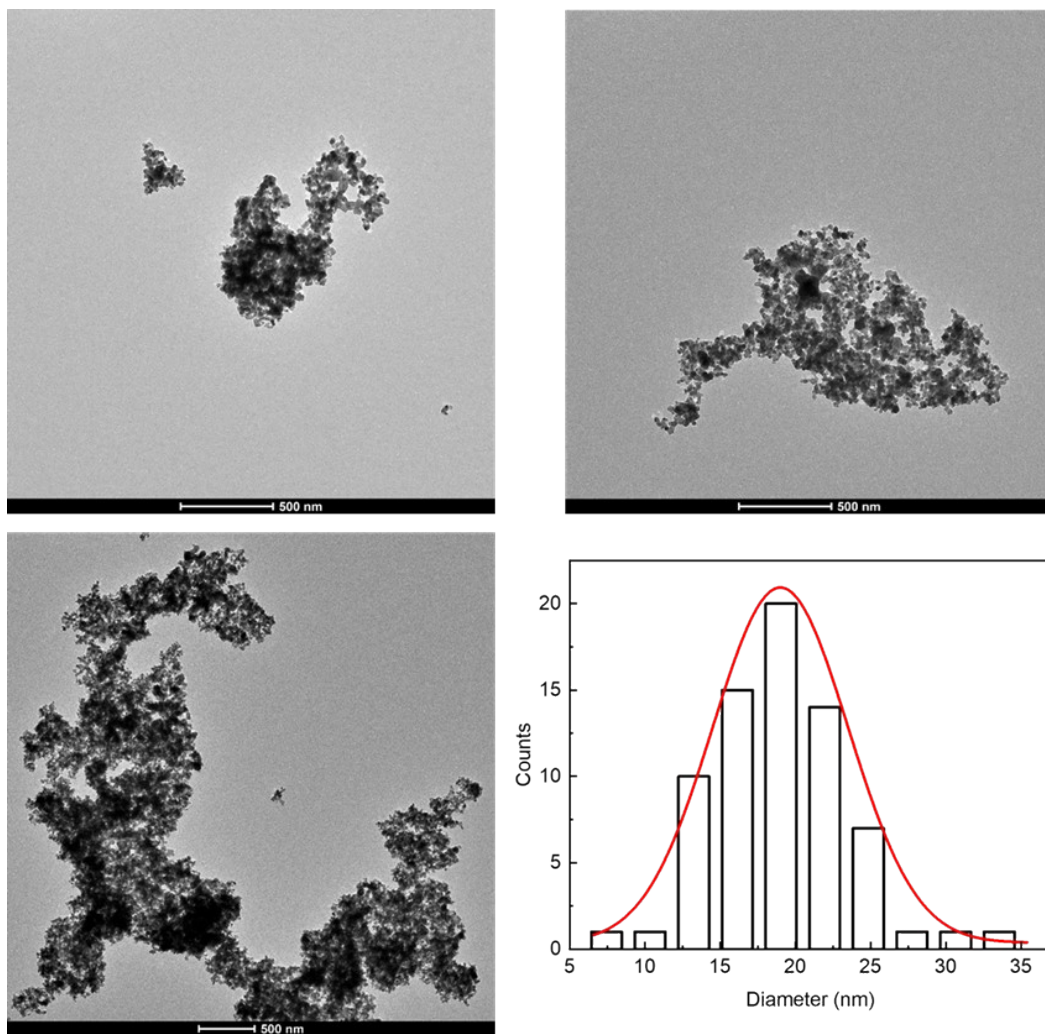

**Figure S7.** TEM images of  $\text{fcSe@TiO}_2$  nanoparticles and size distribution.

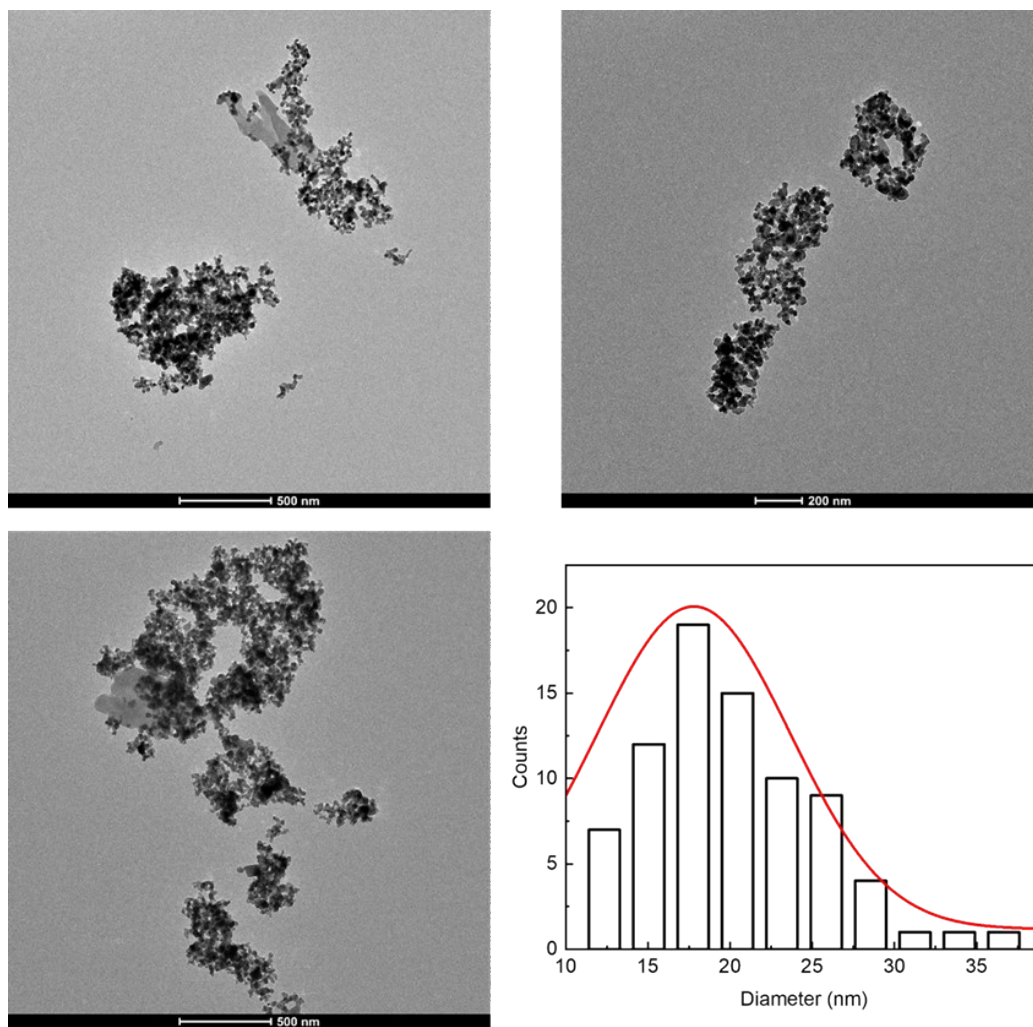

**Figure S8.** TEM images of  $[\text{Cu}_2\text{I}_2(\text{fcSe})_2]_n@ \text{TiO}_2$  nanoparticles and size distribution.

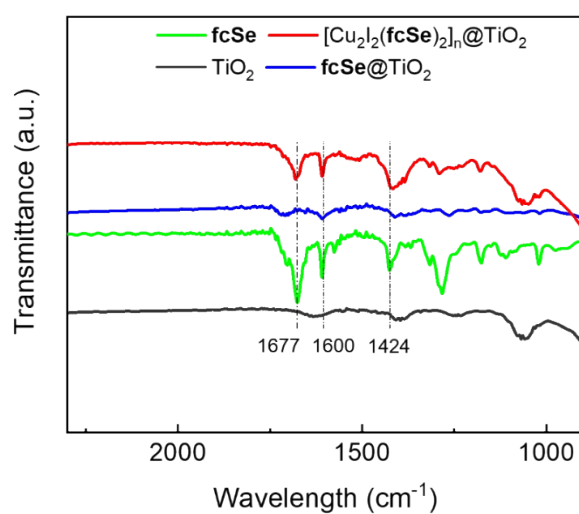

**Figure S9.** FTIR spectra of  $\text{TiO}_2$ ,  $\text{fcSe}$ ,  $\text{fcSe}@ \text{TiO}_2$  and  $[\text{Cu}_2\text{I}_2(\text{fcSe})_2]_n@ \text{TiO}_2$

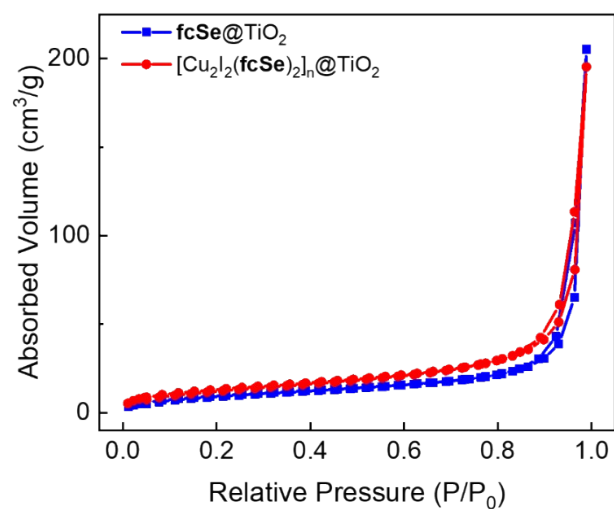

**Figure S10.** Nitrogen adsorption-desorption isotherms of **fcSe@TiO<sub>2</sub>** (blue) and **[Cu<sub>2</sub>I<sub>2</sub>(fcSe)<sub>2</sub>]<sub>n</sub>@TiO<sub>2</sub>** (red).

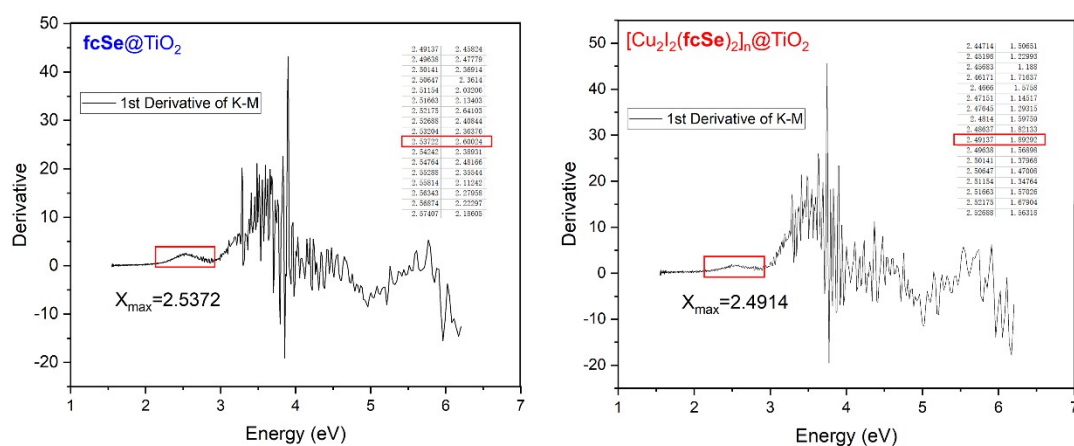

**Figure S11.** The first derivative of the Tauc Plot curve for **fcSe@TiO<sub>2</sub>** and **[Cu<sub>2</sub>I<sub>2</sub>(fcSe)<sub>2</sub>]<sub>n</sub>@TiO<sub>2</sub>**.

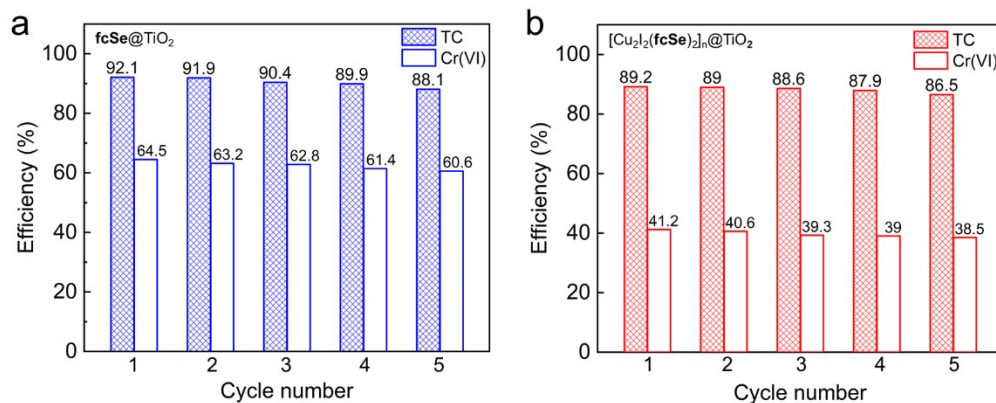

**Figure S12.** Transformation efficiency of (a)  $fcSe@TiO_2$ , (b)  $[Cu_2I_2(fcSe)_2]_n@TiO_2$  for TC and Cr(VI) in multiple catalytic cycles.

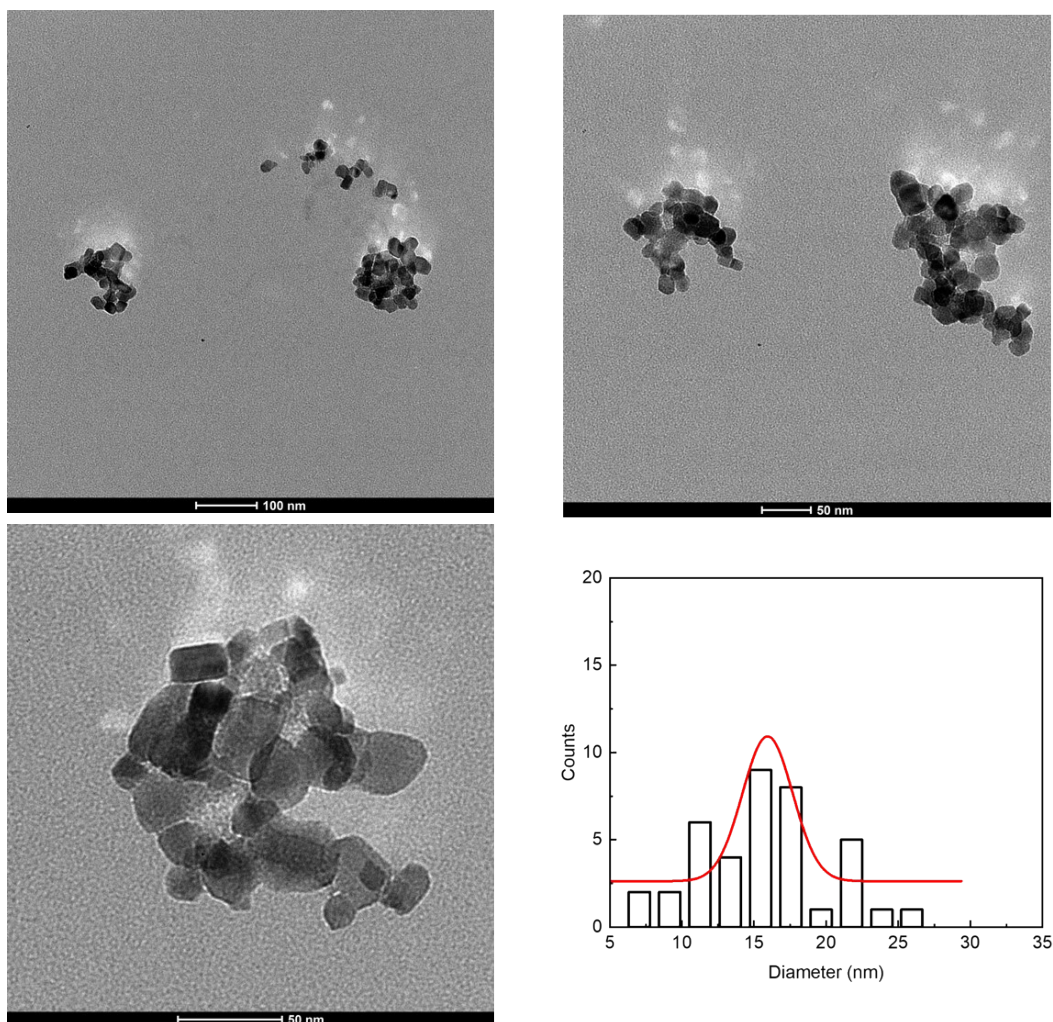

**Figure S13.** TEM images of  $fcSe@TiO_2$  nanoparticles and size distribution after five catalytic cycles.



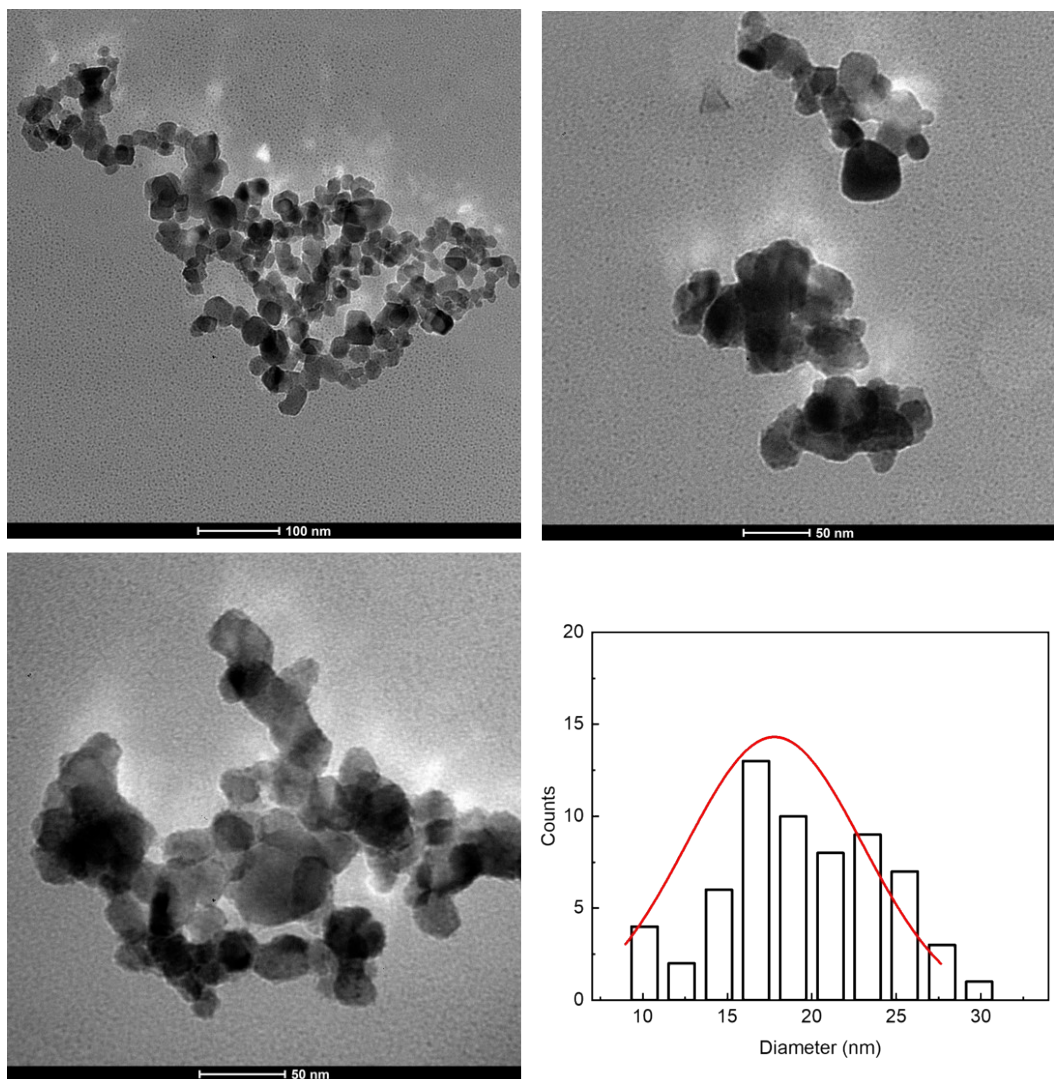

**Figure S14.** TEM images of  $[\text{Cu}_2\text{I}_2(\text{fcSe})_2]_n@ \text{TiO}_2$  nanoparticles and size distribution after five catalytic cycles.

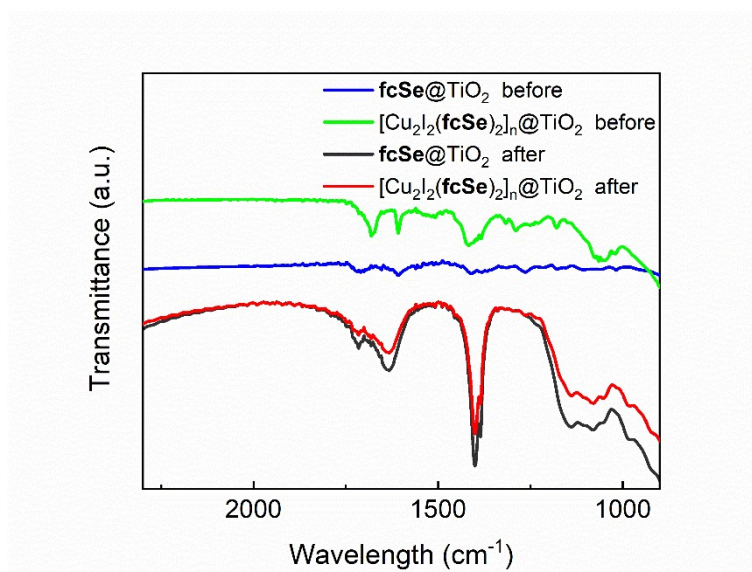

**Figure S15.** FTIR spectra of TiO<sub>2</sub>, fcSe, fcSe@TiO<sub>2</sub> and [Cu<sub>2</sub>I<sub>2</sub>(fcSe)<sub>2</sub>]<sub>n</sub>@ TiO<sub>2</sub> after five cycles.

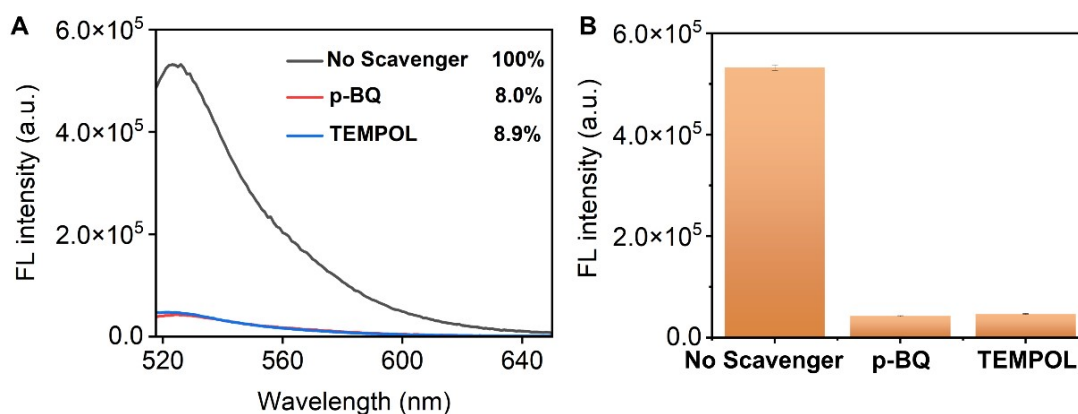

**Figure S16.** The fluorescence change of SOSG in response to <sup>1</sup>O<sub>2</sub> generated in the [Cu<sub>2</sub>I<sub>2</sub>(fcSe)<sub>2</sub>]<sub>n</sub>@TiO<sub>2</sub> system with ·O<sub>2</sub><sup>-</sup> scavenger p-BQ (red line) or TEMPOL (blue line). Experimental conditions are 25-30 °C, pH = 7, [Cu<sub>2</sub>I<sub>2</sub>(fcSe)<sub>2</sub>]<sub>n</sub>@TiO<sub>2</sub> dosage = 0.2 g/L, H<sub>2</sub>O<sub>2</sub> concentration = 20 mM, p-BQ or TEMPOL concentration = 2.5 mM, SOSG concentration = 0.25 μM, 5 min of visible light irradiation.

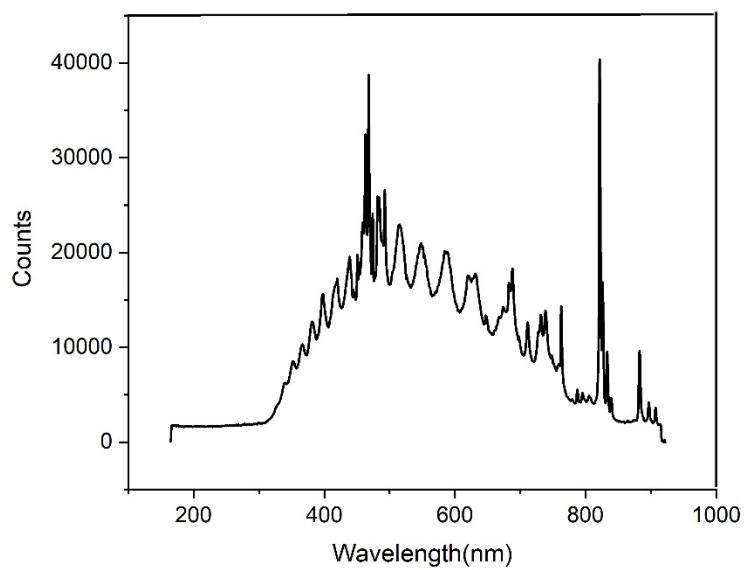

**Figure S17.** The spectrum of the Xenon Lamp MC-PF300C.

**Table S1.** Crystallographic data for **L0**

| Complexes                                                                            | <b>L0</b>                                                        |
|--------------------------------------------------------------------------------------|------------------------------------------------------------------|
| Empirical formula                                                                    | C <sub>28</sub> H <sub>26</sub> FeO <sub>4</sub> Se <sub>2</sub> |
| Formula weight                                                                       | 640.26                                                           |
| Crystal system                                                                       | Monoclinic                                                       |
| Space group                                                                          | <i>P</i> 2 <sub>1</sub> / <i>c</i>                               |
| <i>a</i> (Å)                                                                         | 12.387(3)                                                        |
| <i>b</i> (Å)                                                                         | 6.2596(17)                                                       |
| <i>c</i> (Å)                                                                         | 33.747(9)                                                        |
| $\alpha$ (°)                                                                         | 90                                                               |
| $\beta$ (°)                                                                          | 91.613(3)                                                        |
| $\gamma$ (°)                                                                         | 90                                                               |
| <i>V</i> (Å <sup>3</sup> )                                                           | 2615.6(12)                                                       |
| <i>Z</i>                                                                             | 4                                                                |
| <i>D</i> <sub>c</sub> (g·cm <sup>-3</sup> )                                          | 1.626                                                            |
| $\mu$ (mm <sup>-1</sup> )                                                            | 3.392                                                            |
| <i>F</i> (000)                                                                       | 1280                                                             |
| Crystal size (mm <sup>3</sup> )                                                      | 0.18 × 0.06 × 0.05                                               |
| $\theta$ Range                                                                       | 1.645-25.000                                                     |
| Reflections collected                                                                | 17262                                                            |
| Independent reflections                                                              | 4578 [ <i>R</i> <sub>int</sub> = 0.0610]                         |
| Reflections observed [ <i>I</i> > 2 $\sigma$ ( <i>I</i> )]                           | 3384                                                             |
| Data/restraints/parameters                                                           | 4578/316/0                                                       |
| Goodness-of-fit on <i>F</i> <sup>2</sup>                                             | 1.101                                                            |
| <i>R</i> <sub>1</sub> / <i>wR</i> <sub>2</sub> [ <i>I</i> > 2 $\sigma$ ( <i>I</i> )] | 0.1038/0.1999                                                    |
| <i>R</i> <sub>1</sub> / <i>wR</i> <sub>2</sub> (all data)                            | 0.0785/0.1908                                                    |
| Max., Min. $\Delta\rho$ (e·Å <sup>-3</sup> )                                         | 1.663, -1.490                                                    |



**Table S2.** Selected bond lengths (Å) and bond angles (°) for **L0**

| Bond lengths |           | Bond lengths |           | Bond angles |           |
|--------------|-----------|--------------|-----------|-------------|-----------|
| Se1-C1       | 1.921(8)  | Se1-C11      | 1.972(8)  | C1-Se1-C11  | 98.6(3)   |
| Se2-C6       | 1.892(9)  | Se2-C19      | 1.943(9)  | C6-Se2-C19  | 95.4(4)   |
| O1-C18       | 1.199(15) | O2-C18       | 1.343(17) | C18-O2-C27  | 117.0(11) |
| O3-C26       | 1.212(14) | O4-C26       | 1.327(15) | C26-O4-C28  | 117.2(11) |

**Table S3.** Zeta potentials and Z-average hydrodynamic diameters of **fcSe@TiO<sub>2</sub>** and **[Cu<sub>2</sub>I<sub>2</sub>(fcSe)<sub>2</sub>]<sub>n</sub>@TiO<sub>2</sub>** at different pH.

| pH | <b>fcSe@TiO<sub>2</sub></b> |                                 | <b>[Cu<sub>2</sub>I<sub>2</sub>(fcSe)<sub>2</sub>]<sub>n</sub>@TiO<sub>2</sub></b> |                                 |
|----|-----------------------------|---------------------------------|------------------------------------------------------------------------------------|---------------------------------|
|    | $\zeta$<br>(mv) $\pm$ SD    | Z-average size<br>(nm) $\pm$ SD | $\zeta$<br>(mv) $\pm$ SD                                                           | Z-average size<br>(nm) $\pm$ SD |
| 3  | 9.07 $\pm$ 1.0              | 6716 $\pm$ 57.0                 | 3.70 $\pm$ 0.8                                                                     | 4933 $\pm$ 32.0                 |
| 5  | 5.06 $\pm$ 3.6              | 1530 $\pm$ 22.0                 | 9.77 $\pm$ 2.2                                                                     | 4338 $\pm$ 63.0                 |
| 7  | 25.3 $\pm$ 2.0              | 673.3 $\pm$ 43.0                | -7.46 $\pm$ 1.2                                                                    | 3141 $\pm$ 24.0                 |
| 9  | -40.8 $\pm$ 6.5             | 366.2 $\pm$ 48.0                | -23.1 $\pm$ 4.3                                                                    | 345.4 $\pm$ 30.0                |

**Table S4.** TC photocatalytic degradation efficiency comparison of **fcSe@TiO<sub>2</sub>** and **[Cu<sub>2</sub>I<sub>2</sub>(fcSe)<sub>2</sub>]<sub>n</sub>@TiO<sub>2</sub>** with other representative systems.

| Catalyst                                                                           | Catalyst dosage<br>g/L | H <sub>2</sub> O <sub>2</sub><br>mM | Initial pH | TC initial concentration<br>mg/L | Degradation effect | Reference        |
|------------------------------------------------------------------------------------|------------------------|-------------------------------------|------------|----------------------------------|--------------------|------------------|
| <b>fcSe@TiO<sub>2</sub></b>                                                        | 0.2                    | 19.8                                | 7          | 20                               | 30 min 93.1%       | <b>This work</b> |
| <b>[Cu<sub>2</sub>I<sub>2</sub>(fcSe)<sub>2</sub>]<sub>n</sub>@TiO<sub>2</sub></b> | 0.2                    | 19.8                                | 7          | 20                               | 30 min 91.3%       | <b>This work</b> |
| Fe <sup>2+</sup>                                                                   | 0.005                  | 0.59                                | 7.5        | 100                              | 60 min 97.1%       | 2                |

|                                                                     |      |         |      |     |               |    |
|---------------------------------------------------------------------|------|---------|------|-----|---------------|----|
| Fe-MOFs                                                             | 0.15 | 10 mL/L | 4.1  | 50  | 20 min 82.5%  | 3  |
| C@FONC                                                              | 0.5  | 5       | 3    | 150 | 180 min 97.9% | 4  |
| Fe-POM/CNNS-N <sub>vac</sub>                                        | 1    | 10      | 4.5  | 20  | 18 min 96.5%  | 5  |
| 15-yCeO <sub>2</sub> /Fh                                            | 0.4  | 50      | 4    | 20  | 60 min 93.6%  | 6  |
| Fe-R-2                                                              | 0.4  | 10      | 3.81 | 100 | 120 min 98.1% | 7  |
| APRM-110                                                            | 0.5  | 20      | 4.3  | 40  | 60 min 87.8%  | 8  |
| MFO-Au <sub>3</sub>                                                 | 0.1  | 50      | 6    | 20  | 90 min 88.3%  | 9  |
| 0.8MLD/CN/Fe <sub>3</sub> O <sub>4</sub>                            | 0.5  | 80      | 7    | 20  | 80 min 95.8%  | 10 |
| Cu-HNCN/PF                                                          | 0.2  | 20      | 6.5  | 10  | 50 min 96%    | 11 |
| Fe-g-C <sub>3</sub> N <sub>4</sub> /Bi <sub>2</sub> WO <sub>6</sub> | 0.4  | 1       | 6.5  | 10  | 120 min 93.9% | 12 |
| FMCNEP                                                              | 1.3  | 20      | 5    | 25  | 60 min 97.5%  | 13 |

**Table S5.** LC-MS information and proposed structure of photocatalytic products in the catalytic degradation of TC by **fcSe@TiO<sub>2</sub>** and **[Cu<sub>2</sub>I<sub>2</sub>(fcSe)<sub>2</sub>]<sub>n</sub>@TiO<sub>2</sub>**

| Intermediate Products | Retention Time (min) | MS (m/z) | Molecular Formula                                             | Supposed Structure                                                                    | fcSe@TiO <sub>2</sub> | [Cu <sub>2</sub> I <sub>2</sub> (fcSe) <sub>2</sub> ] <sub>n</sub> @TiO <sub>2</sub> |
|-----------------------|----------------------|----------|---------------------------------------------------------------|---------------------------------------------------------------------------------------|-----------------------|--------------------------------------------------------------------------------------|
| TC                    | 6.49-6.59            | 445      | C <sub>22</sub> H <sub>24</sub> N <sub>2</sub> O <sub>8</sub> | 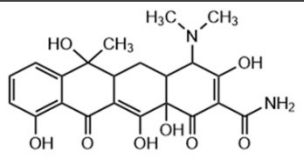   | ✓                     | ✓                                                                                    |
| I1                    | 6.62-6.72            | 461      | C <sub>22</sub> H <sub>26</sub> N <sub>2</sub> O <sub>9</sub> |    | ✓                     | ✓                                                                                    |
| I2                    | 6.77-6.86            | 433      | C <sub>20</sub> H <sub>22</sub> N <sub>2</sub> O <sub>9</sub> |    | ✓                     | ✓                                                                                    |
| I3                    | 6.87-6.94            | 427      | C <sub>22</sub> H <sub>22</sub> N <sub>2</sub> O <sub>7</sub> |   | ✓                     | ✓                                                                                    |
| I4                    | 6.48-6.45            | 353      | C <sub>16</sub> H <sub>20</sub> N <sub>2</sub> O <sub>7</sub> |  | ✓                     | ✓                                                                                    |
| I5                    | 6.21-6.3             | 337      | C <sub>14</sub> H <sub>8</sub> O <sub>10</sub>                |  | ✓                     | ✓                                                                                    |

|     |           |     |                       |                                                                                       |   |   |
|-----|-----------|-----|-----------------------|---------------------------------------------------------------------------------------|---|---|
| I6  | 7.19-7.27 | 417 | $C_{20}H_{22}N_2O_8$  | 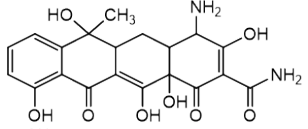   | ✓ | ✓ |
| I7  | 7.04-7.11 | 447 | $C_{20}H_{17}NO_{11}$ |    | ✓ | ✓ |
| I8  | 7.13-7.19 | 325 | $C_{19}H_{14}O_5$     |    | ✓ | - |
| I9  | 6.8-6.91  | 266 | $C_{13}H_{14}O_6$     |    | ✓ | - |
| I10 | 6.2-6.39  | 256 | $C_{16}H_{16}O_3$     |    | ✓ | ✓ |
| I11 | 5.85-6.04 | 242 | $C_{15}H_{14}O_3$     |   | ✓ | ✓ |
| I12 | 6.73-6.82 | 297 | $C_{12}H_8O_9$        |  | - | ✓ |

**Table S6.** Evaluation of  $\text{fcSe@TiO}_2$  and  $[\text{Cu}_2\text{I}_2(\text{fcSe})_2]_n@\text{TiO}_2$  in the visible light photo-degradation of representative N-cyclic organics<sup>a</sup>.

| N-cyclic organics | Structural formula                                                                  | $\text{fcSe@TiO}_2$ |                            | $[\text{Cu}_2\text{I}_2(\text{fcSe})_2]_n@\text{TiO}_2$ |                            |
|-------------------|-------------------------------------------------------------------------------------|---------------------|----------------------------|---------------------------------------------------------|----------------------------|
|                   |                                                                                     | Removal efficiency  | $\eta_{\text{CO+HCOOH}}^b$ | Removal efficiency                                      | $\eta_{\text{CO+HCOOH}}^b$ |
| Tetracycline      | 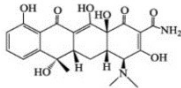   | 93.1%               | 7.2%                       | 91.3%                                                   | 6.1%                       |
| Ciprofloxacin     |    | 86.2%               | 11.8%                      | 64.9%                                                   | 20.8%                      |
| Methylene blue    |    | 93.9%               | 8.1%                       | 41.4%                                                   | 6.6%                       |
| Toluidine blue    |    | 94.2%               | 6.9%                       | 88.9%                                                   | 10.8%                      |
| Pigment Green     |    | 92.0%               | 3.0%                       | 93.7%                                                   | 4.3%                       |
| Basic violet      |    | 92.3%               | 4.4%                       | 86.2%                                                   | 3.7%                       |
| Methyl Orange     |   | 17.1%               | 7.9%                       | 16.0%                                                   | 7.3%                       |
| Imidazole         |  | 16.6%               | 4.7%                       | 25.9%                                                   | 5.9%                       |

<sup>a</sup> Experimental conditions are 25-30 °C, pH = 7, catalyst dosage = 0.2 g/L,  $\text{H}_2\text{O}_2$  concentration = 20 mM.

<sup>b</sup> The conversion rate CO and HCOOH  $\eta_{\text{CO+HCOOH}}$  was calculated by Eq. (4).

## References

- [1] M.R. Burgess, S. Jing, C.P. Morley, *J. Organomet. Chem.*, 2006, **691**, 3484-3489.
- [2] C. Han, H. Park, S. Kim, V. Yargeau, J. Choi, S. Lee, J. Park, *Water Res.*, 2020, **172**, 115514.
- [3] Q. Wu, H. Yang, L. Kang, Z. Gao, F. Ren, *Appl. Catal. B-Environ.*, 2020, **263**, 118282.
- [4] J. Zhou, F. Ma, H. Guo, D. Su, *Appl. Catal. B-Environ.*, 2020, **269**, 118784.
- [5] J. Jiang, X. Wang, Y. Liu, Y. Ma, T. Li, Y. Lin, T. Xie, S. Dong, *Appl. Catal. B-Environ.*, 2020, **278**, 119349.
- [6] X. Huang, N. Zhu, F. Mao, Y. Ding, S. Zhang, H. Liu, F. Li, P. Wu, Z. Dang, Y. Ke, *Chem. Eng. J.*, 2020, **392**, 123636.
- [7] S. Guo, W. Yang, L. You, J. Li, J. Chen, K. Zhou, *Chem. Eng. J.*, 2020, **393**, 124758.
- [8] Q. Li, G. Wei, Y. Yang, L. Gao, L. Zhang, Z. Li, X. Huang, J. Gan, *Chem. Eng. J.*, 2021, **424**, 130537.
- [9] L. Qin, Z. Wang, Y. Fu, C. Lai, X. Liu, B. Li, S. Liu, H. Yi, L. Li, M. Zhang, Z. Li, W. Cao, Q. Niu, *J. Hazard Mater.*, 2021, **414**, 125448.
- [10] X. Zhang, B. Ren, X. Li, B. Liu, S. Wang, P. Yu, Y. Xu, G. Jiang, *J. Hazard Mater.*, 2021, **418**, 126333.
- [11] X. Zhang, B. Xu, S. Wang, X. Li, C. Wang, Y. Xu, R. Zhou, Y. Yu, H. Zheng, P. Yu, Y. Sun, *Appl. Catal. B-Environ.*, 2022, **306**, 121119.
- [12] C. Liu, H. Dai, C. Tan, Q. Pan, F. Hu, X. Peng, *Appl. Catal. B-Environ.*, 2022, **310**, 121326.
- [13] Y. Liu, X. Wang, Q. Sun, M. Yuan, Z. Sun, S. Xia, J. Zhao, *J. Hazard. Mater.*, 2020, **424**, 127387.
